# Supplementary material for: Involvement of the Cerebral Monoamine Neurotransmitters System in Antidepressant-Like Effects of a Chinese Herbal Decoction, Baihe Dihuang Tang, in Mice Model
Source: Hindawi journal article supplement (doi:10.1155/2012/419257), 2012-01-01
Supplement: f1 [file 419257.f1.pdf]

## Supplementary Material

Table 2. Calibration curve and limit of quantitation (LOQ) for quantitative analysis of five monoamine neurotransmitter in mice brain

| Monoamine neurotransmitter<br>Standard compound | calibration curve | R <sup>2</sup> | LOQ<br>(µg/ml) |
|-------------------------------------------------|-------------------|----------------|----------------|
| NA                                              | Y=95.47X+18.27    | 0.9992         | 0.16           |
| DA                                              | Y=86.58X+14.81    | 0.9996         | 0.15           |
| 5-HT                                            | Y=824.08X-10.26   | 0.9993         | 0.26           |
| 5-HIAA                                          | Y=384.95X+11.43   | 0.9997         | 0.09           |
